1       **Trial by trial, machine learning approach identifies temporally discrete A $\delta$ -**  
2       **and C-fibre mediated laser evoked potentials that predict pain behaviour in**  
3       **rats.**  
4

5       Sales, A.C.<sup>1\*</sup>, Blockeel, A.J.<sup>1\*†</sup>, Huxter, J.R.<sup>2</sup>, Dunham, J.P.<sup>1</sup>, Drake, R.A.R.<sup>1</sup>, Truini, A.<sup>3</sup>, Mouraux, A.<sup>4</sup>,  
6       Treede, R.D.<sup>5</sup>, Phillips, K.G.<sup>1,6</sup>, Pickering A.E.<sup>1</sup>

7  
8       \* These authors contributed equally to this study

9       † Corresponding author: [Tony.Blockeel@Bristol.ac.uk](mailto:Tony.Blockeel@Bristol.ac.uk)

10  
11       1 - Anaesthesia, Pain & Critical Care Research, School of Physiology, Pharmacology & Neuroscience,  
12       University of Bristol, Bristol, BS8 1TD

13       2 - Transpharmation Ltd., Building 500, Discovery Park, Ramsgate Road, Sandwich, Kent, UK

14       3 - Department of Human Neuroscience, Sapienza University, Rome, Italy.

15       4 - Institute of Neuroscience (IoNS), UCLouvain, Bruxelles, Belgium.

16       5 - Department of Neurophysiology, Mannheim Center for translational Neuroscience (MCTN),  
17       Medical Faculty Mannheim of Heidelberg University, Mannheim, Germany.

18       6 - Eli Lilly and Company, Neuroscience Next Generation Therapeutics, Lilly Innovation Center,  
19       Cambridge, MA, U.S.A.

## Abstract

Laser evoked potentials (LEPs) – the EEG response to temporally-discrete thermal stimuli – are commonly used in experimental pain studies in humans. Such stimuli selectively activate nociceptors and produce EEG features which correlate with pain intensity. The rodent LEP has been proposed to be a translational biomarker of nociception and pain, however its validity has been questioned because of reported differences in the classes of nociceptive fibres mediating the response. Here we use a machine learning, trial by trial analysis approach on wavelet-denoised LEPs generated by stimulation of the plantar hindpaw of rats. The LEP amplitude was more strongly related to behavioural response than to laser stimulus energy. A simple decision tree classifier using LEP features was able to predict behavioural responses with 73% accuracy. An examination of the features used by the classifier showed that mutually exclusive short and long latency LEP peaks were clearly seen in single-trial data, yet were not evident in grand average data pooled from multiple trials. This bimodal distribution of LEP latencies was mirrored in the paw withdrawal latencies which were preceded and predicted by the LEP responses. The proportion of short latency events was increased after intradermal application of high dose capsaicin (to defunctionalise TRPV1 expressing nociceptors), suggesting they were mediated by A $\delta$ -fibres (specifically AMH-I). These findings demonstrate that both C- and A $\delta$ -fibres contribute to rodent LEPs and concomitant behavioural responses, providing a real-time assay of specific fibre function in conscious animals. Single-trial analysis approaches can improve the utility of LEPs as a translatable biomarker of pain.

## 44 Introduction

45

46 Rapid heating of the skin by infrared lasers causes selective activation of thermally-responsive  
47 nociceptors. In humans this generates the percept of pain and triggers distinct EEG responses known  
48 as ‘laser evoked potentials’ (LEPs)<sup>1,2</sup>. Features of the LEP – particularly its amplitude – correlate with  
49 pain perception and this methodology has been employed in a diverse range of mechanistic pain  
50 studies<sup>3–10</sup>. In rodents, similar LEP features are reported to be closely related to nociceptive intensity<sup>11–</sup>  
51 <sup>13</sup> and this similarity presents the possibility that the LEP could be used as a translatable biomarker of  
52 pain i.e. a proxy measure for pain applicable across species. In experiments focusing on pain  
53 mechanisms or novel analgesic drugs, the existence of a reliable, translatable marker could help bridge  
54 the gap between animal studies and clinical trials. To have confidence that the LEP is such a marker,  
55 it is necessary for it to have comparable underlying neural mechanisms - from the activation of  
56 nociceptors in the periphery, to the subsequent cortical event observed on the EEG. In humans, laser  
57 stimulation selectively activates A $\delta$ - and C-nociceptors in superficial layers of the skin<sup>2,14</sup>, with EEG  
58 responses primarily reflecting the activation of A $\delta$  fibres. LEPs on the timescale of C-fibres are  
59 generally only apparent in humans when A-fibres have been blocked, or when stimuli are carefully  
60 tailored to preferentially evoke C-fibre responses<sup>1,15,16</sup>.

61 In rodents, there is good evidence that contact heating of the paw can activate both C and A $\delta$ -fibres  
62 (dependent on the rate of heating) to trigger withdrawal<sup>17,18</sup>. Laser stimulation of the plantar surface  
63 of the foot elicits responses in dorsal horn neurons at conduction velocities consistent with both A $\delta$ -  
64 and C-fibres<sup>19</sup>. Other studies have reported evidence of C-fibre activation, but have described A $\delta$   
65 responses as highly variable, requiring higher intensity stimuli<sup>19–21</sup>. In addition, EEG and current sink  
66 studies have reported both short and long latency cortical responses, attributed to A $\delta$ - and C-fibres  
67 respectively<sup>22,23</sup>. Challenging this view, two recent papers have proposed that the short latency LEP  
68 components in rodents are artefactual, created by the ultrasonic noise associated with laser  
69 stimulation<sup>11,12</sup>. Indeed this analysis has gone further to report that C-fibres are the sole mediators of  
70 the rodent LEP<sup>11,12</sup>. Clearly this would represent a substantial inter-species difference between human  
71 and rodent models.

72 The interpretation of EEG results is complicated by the common practice of averaging over events to  
73 form an overall LEP for a given stimulus energy. This process is designed to reduce the noise that is  
74 often present in EEG recordings, however it can also mask meaningful information. This is especially  
75 true when a small proportion of responses are qualitatively different from the rest. In this case, these

76 rarer responses are liable to be 'lost' in the averaging, leading a reduction in information about  
77 response variability and potentially confounding interpretation of the resultant data<sup>24,25</sup>.

78 In this study, LEPs and behavioural responses were evaluated across a range of laser energies. Both  
79 individual and mean responses were analysed to gain insight into the relationships between stimulus  
80 energy, LEP morphology, behavioural responses, and the mode of transmission. We found mutually  
81 exclusive short and long latency responses occurring at the level of individual LEPs. Short latency  
82 events were rarer than long latency events (around 30% of events at higher stimulus energies) and  
83 were not initially apparent in the averaged data. Using a machine learning approach, we show that  
84 individual denoised LEPs can be used to predict behavioural responses with an accuracy of >70% - and  
85 that both the amplitude and latency of individual LEPs are important for classification. Injection of a  
86 high dose of capsaicin into the hindpaw – to defunctionalise TRPV1 expressing nociceptors – increased  
87 the proportion of short latency responses and caused the mean LEPs to become shifted towards  
88 shorter latencies. This provides evidence for the involvement of both A $\delta$ - and C-fibres in rodent LEP  
89 responses and behaviour, and suggests that single trial analysis of LEPs can provide valuable  
90 information about the mode of transmission of nociceptive information from the periphery.

91

92

## Results

93

### Behavioural responses to laser stimuli

94

Infra-red Nd:YAP laser stimuli were delivered alternately to either the left or right hind paws at a range of energies between 0.75J and 2J (wavelength 1340nm x 4ms), with a minimum interstimulus interval of 30s (Figure 1a,b). Behavioural responses were initially scored into five categories, where a higher score corresponded to a greater degree of pain related behaviour (Figure 1c,d). However, because very few events were categorised as '1' or '3' (Figure 1d), these scores were too infrequent to allow meaningful statistical inference and so were 'collapsed' to produce a simplified 3-point scale (Figure 1c). In this simplified scale, a score of zero for a particular event indicated no response. Scores 1-2 denote a 'flinch' response, that is, a brief indication of awareness to the stimulus (for instance, a head turn, body movement or a momentary foot-lift), but without clear signs of pain-like behaviour. In contrast scores 3-4 describe a clear withdrawal of the foot with nocifensive responses such as licking, grooming, or extended attention to the affected foot (see Methods).

95

96

97

98

99

100

101

102

103

104

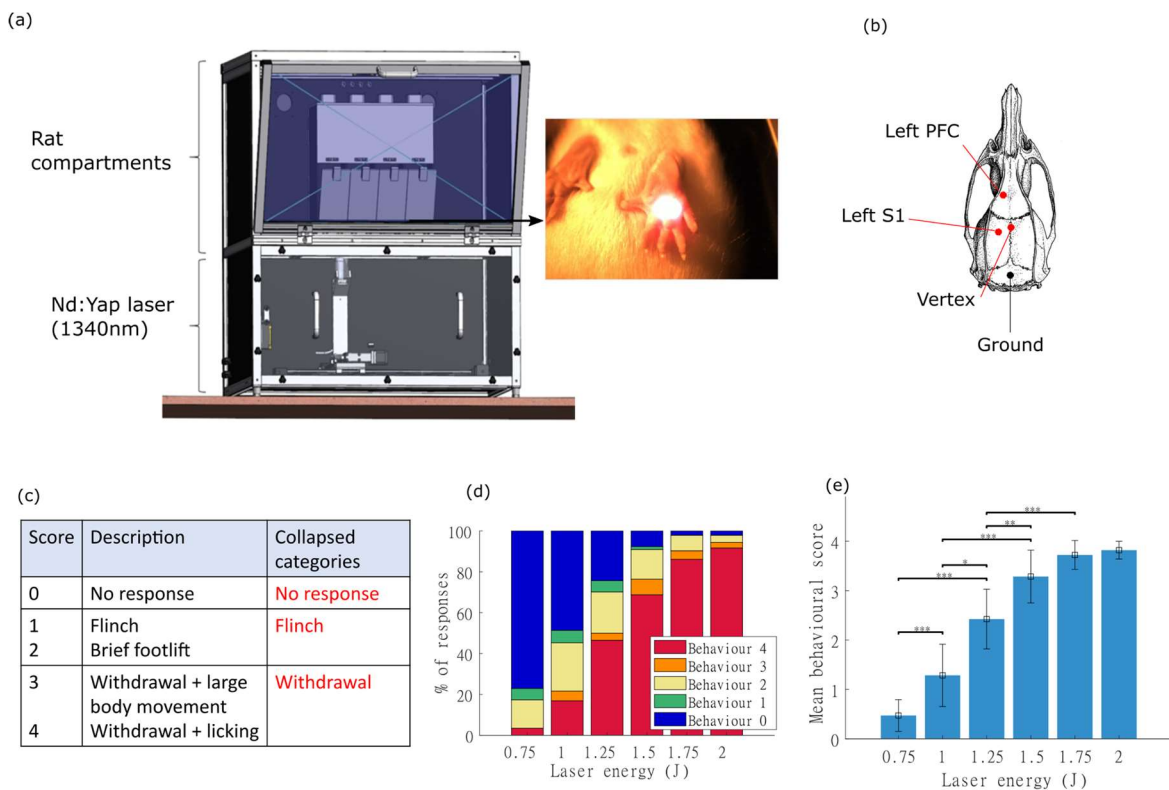

105

106

107

108

109

110

111

112

113

**Figure 1 Overview of experiment and behavioural responses.** (a) Apparatus overview. Four individual rat compartments were located on a glass floor above a fibre optic cable which transmitted the light from an infra-red Nd:YAP laser. With the aid of a camera in the lower compartment, a motorised xy-stage allowed remote targeting of the laser to the plantar surface. (b) Location of selected skull screws implanted in rats and used for recording EEG (c) Descriptions of behavioural score categories of the response to laser stimulation, with 'full' and 'collapsed' categories. (d) Proportions of behavioural responses in each category for each laser energy (across all animals) showing the increase in the behavioural response with laser energy. Note few responses were scored as '1' or '3'. (e) Distribution

114 of mean behavioural scores (repeated measures ANOVA, Bonferroni correction for multiple  
115 comparisons, \*  $p < 0.05$ , \*\*  $p < 0.01$ , \*\*\*  $p < 0.001$  )

116  
117  
118 The relationships between laser energy, side of stimulus and behavioural response were explored. As  
119 expected, there was a significant effect of laser stimulus energy on behavioural score ( $F=130.45$ ,  
120  $p < 0.001$ , repeated measures ANOVA), with increasing laser energies evoking greater behavioural  
121 responses (Figure 1d,e). This stimulus-response function showed a sigmoid relationship: at the lowest  
122 stimulus energies, the behavioural responses were almost always '0' (no response), with a steep rise  
123 between 1 and 1.5J, whilst at 1.75 or 2J responses plateaued and were almost always '4' (withdrawal  
124 with licking). There was no significant effect of side of stimulation on the behavioural response score.

### 125 Characteristics of laser event related potentials (LEPs)

126 To provide a comparison to previous studies<sup>11-13</sup>, the LEP responses for each animal were initially  
127 analysed by averaging EEG responses over all events within a given group - for instance, all events at  
128 a specific energy or behavioural category. Consistent with previous reports<sup>11</sup>, mean LEPs recorded  
129 across all skull sites had a stereotyped morphology that was comprised of a distinct peak whose  
130 amplitude and latency were related to the laser energy and behavioural response (Figure 2a-d). For  
131 the vertex EEG site, there was no significant lateralisation of response (as measured from peak LEP  
132 height,  $p > 0.05$ , one way repeated measures ANOVA with laser energy and side as within subject  
133 factors), therefore for all subsequent analyses the vertex responses to both right and left hind paw  
134 stimulation were pooled. Lateralisation was found for left prefrontal and left somatosensory cortex  
135 LEP, with amplitudes that were greater following stimulation of the contralateral hind paw ( $F=6.1$ ,  
136  $p=0.03$  and  $F=12.0$ ,  $p=0.005$  respectively, figure 2d). For these sites, all subsequent analyses were  
137 restricted to trials where the stimulation was applied on the contralateral side.

138 There was a positive correlation between laser stimulus energy and LEP amplitude (for the vertex site,  
139  $F=32.8$ ,  $p < 0.001$ , repeated measures ANOVA, Figure 2e) in agreement with previous studies<sup>11,13</sup>. There  
140 was also a concomitant modest shortening in the latency to peak amplitude as the laser energy was  
141 increased (for the vertex site,  $F=2.6$ ,  $p=0.04$ , Figure 2f).

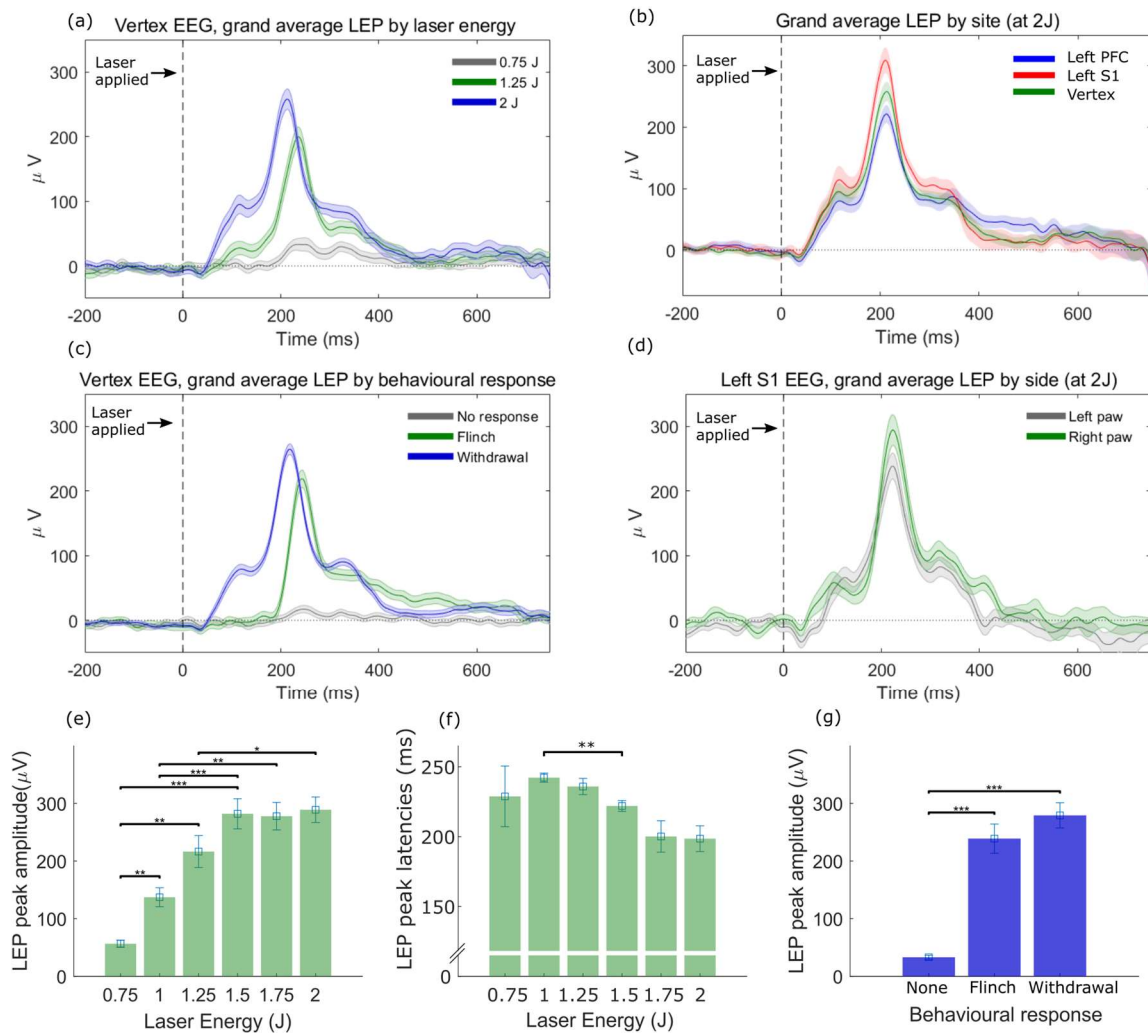

**Figure 2 Grand average LEPs and variation of amplitude and latency.** Form of the LEP waveform with respect to (a) laser energy, (b) EEG recording site, (c) behavioural responses and (d) side of stimulation ((a), (b) and (d) show responses at fixed laser energies, across all behaviours, while (c) shows responses associated with particular behaviours irrespective of laser energies). (e)–(g) Relationship between amplitude/latency of averaged vertex LEPs and laser energy or behaviour (repeated measures ANOVA, Bonferroni correction \*  $p < 0.05$ , \*\*  $p < 0.01$ , \*\*\*  $p < 0.001$ ).

### LEP amplitude is more strongly related to behavioural response than laser energy

The magnitude of the laser stimulus strongly influenced the behavioural response (Figure 1d,e), therefore we also expected there to be a correlation between LEP amplitude and behaviour. Indeed, when LEPs were grouped according to behaviour (averaging over intensities), there was a strong effect of behavioural category on LEP amplitude (for the vertex site,  $F = 72.3$ ,  $p < 0.001$ , Figure 2g) but not on peak latency. Further analysis indicated that whilst both laser energy and behavioural response influence the amplitude of the LEP; behavioural response is the dominant factor. When laser energy was held constant within the range 1-1.75J (intensities at which all behavioural categories are

161 observed and statistical analysis is meaningful), there was a significant interaction between behaviour  
162 and LEP amplitude (for fixed laser energies of either 1-1.25J:  $F=41.6$ ,  $p<0.001$ , or 1.5-1.75J:  $F=31.8$ ,  
163  $p<0.001$ ). In contrast, when the LEP data was analysed according to behavioural score there was no  
164 significant effect of laser energy on LEP amplitude, suggesting that LEP amplitude is more strongly  
165 related to the behavioural response. The relationship to laser energy is therefore secondary to the  
166 observation that higher energies are more likely to produce a stronger behavioural response (i.e.  
167 withdrawal) and thus a higher peak amplitude. Therefore as is believed to be the case in humans<sup>26</sup>,  
168 LEP characteristics likely reflect processing and decision making on incoming nociceptive information  
169 (reflected in behavioural response), rather than simply encoding nociceptive sensory information from  
170 the periphery.

171 Similar relationships between LEP amplitude, stimulus energy and behaviour were found for the left  
172 sensory and prefrontal EEG recording sites (supplementary table 1, with the exception of the lack of  
173 latency changes with stimulus energy within the sensory cortex). This suggests that representative LEP  
174 information can be usefully measured from a single recording site. Consequently, in the following  
175 sections the results will be based on data from the vertex EEG site unless otherwise indicated.

176 EEG spectral power analysis showed that laser stimuli were associated with a change in power in the  
177 delta (0.5-5Hz), theta (5-12Hz) and high gamma (50-100Hz) ranges, as previously reported<sup>13</sup>. The  
178 power in all ranges was increased relative to baseline in the 400ms time window following the laser  
179 stimulus (shown in supplementary figure 1). For the vertex site, the percentage increase in all ranges  
180 relative to a pre-stimulus baseline was related to both laser energy and behaviour (supplementary  
181 table 2a), however, the stimulus energy did not modulate power in the delta and theta ranges when  
182 analysed within behavioural response. In contrast, the relationship between spectral power and  
183 behavioural response remained significant for all three frequency bands when stimulus energy was  
184 held constant at 1J (at which a range of behaviours were evoked supplementary table 2b). This  
185 indicates that behaviour is the dominant factor determining the form of the LEP in both the amplitude  
186 and frequency domains.

### 187 [Machine learning investigation of LEP features that predict behaviour](#)

188 We assessed whether any LEP features could reliably be used to classify the behavioural responses to  
189 individual events using machine learning algorithms, because such techniques can provide new  
190 insights, without pre-existing biomechanistic bias. Decision trees provide a straightforward method of  
191 achieving this aim and are importantly able to provide a clear account of the components of the LEP  
192 that are most informative.



193 LEP responses from the vertex recording site were pooled across all animals to form a cross-subject  
194 prediction. The decision tree classification algorithm was provided with an array of features found to  
195 be modulated by behavioural response, including the voltage values at different latencies from laser  
196 stimulation (averaged over 30ms bins), the peak amplitude and latency of the LEP, and the change in  
197 power in the delta, theta and gamma ranges. The algorithm was trained to distinguish between  
198 behavioural scores in three grouped categories corresponding to the ‘no response’, ‘flinch’ or  
199 ‘withdrawal’ groupings. To train the model, a training dataset was created using equal numbers of  
200 LEPs from each behavioural category. This training set was split into subsets each containing 20% of  
201 the data. On each training run, four of these subsets (80% of the data) were used to train the  
202 classifier, with the remaining 20% used to test performance. This procedure was repeated 5 times,  
203 using a different 20% as the test set on each run. Accuracy (the proportion of events correctly  
204 classified) was evaluated using performance on the test sets (‘5-fold cross validation’). Using this  
205 approach, training was performed with between 1 and 10 decision branch splits in the tree, with  
206 overall performance reported for the best performing number of splits. Once chosen, this parameter  
207 value was then used to train the final model using all the data.

208 Using features extracted from LEPs with standard pre-processing (bandpass filtering and removal of  
209 extreme outlier values, as detailed in Methods) the decision tree classified behavioural outcomes with  
210 a 71% accuracy using only two key decision points: peak amplitude and peak latency. To reduce the  
211 random variance in the recordings, individual LEPs were then wavelet denoised using the method of  
212 Ahmadi et al<sup>27</sup> (examples shown in Figure 3a). This technique allows extraction of LEP-related features  
213 (described by their wavelet coefficients) from the background noise of the ongoing EEG. This process  
214 resulted in a relatively small increase in classifier performance to 73% (using the same process  
215 described above for the raw data; the final trained model and performance statistics are shown in  
216 Figure 3b and c). However, after wavelet denoising, the optimal classifier decision tree (Figure 3b) was  
217 found to use three features – peak amplitude, latency and the value of the voltage at t=210-240ms  
218 (likely because the voltage values became more informative after denoising).

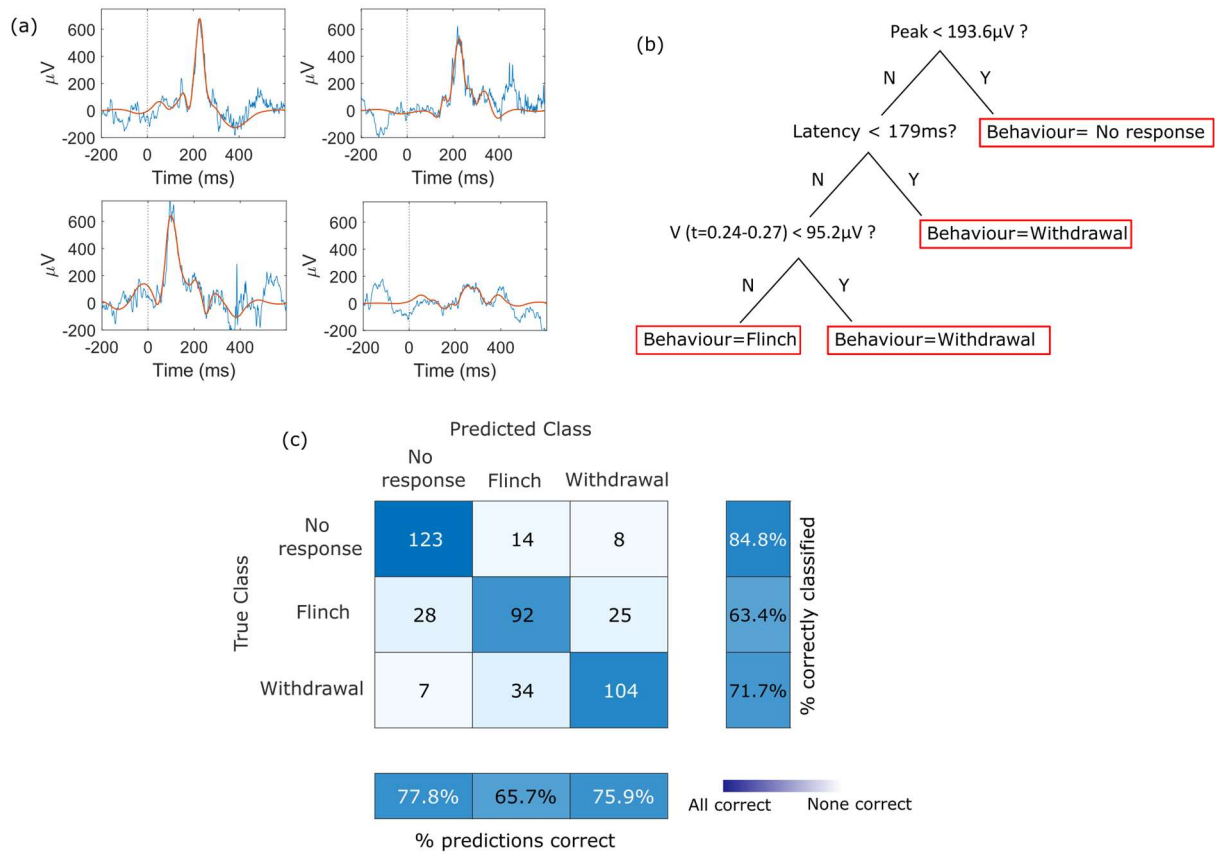

219

220 **Figure 3 Decision tree classification of individual LEPs.** (a) Examples of raw (blue) and denoised (red)  
 221 single LEPs. (b) Final trained coarse decision tree model for classifying individual LEPs by behavioural  
 222 response. (c) Matrix illustrating key performance indicators of the coarse decision tree, from 5-fold  
 223 cross validation training (see main text). Raw values show the number of trials in specific combinations  
 224 of predicted/true results, e.g. in the top middle square, there were 14 examples of events which were  
 225 predicted to be in category 'flinch' but were actually in category 'no response'. Summary statistics  
 226 around the matrix represent the percentage predictions that were correct (bottom) and the  
 227 percentage of actual results which were correctly classified (right).

228

229

230 To put the performance of the decision tree into context, a selection of other machine learning  
 231 classifiers were also trained on the denoised data, including fine decision trees, k-means clustering  
 232 and ensemble techniques. These exhibited comparable performance to the decision tree (61%-75%;  
 233 see supplementary table 3), however, these approaches provide limited insight into the features used  
 234 to arrive at the classification and so were not explored further.

235 The importance of the individual features used by the optimal decision tree classifier were explored  
 236 in more detail (full results in supplementary table 4). When LEP amplitude was used as the sole feature  
 237 predicting behaviour accuracy dropped to 63%; despite being permitted up to 5 splits, the classifier  
 238 was not able to predict any events as belonging to class 2 ('flinch'), but placed every LEP into either

239 'no response' or 'withdrawal'. This demonstrates the importance of the latency information in the  
240 performance of the classifier. This result was unexpected as the variance of the peak latency with  
241 behaviour in the averaged data is insignificant, suggesting that latency would not contribute any extra  
242 information when peak amplitude (which does vary strongly with both behaviour and laser energy,  
243 Figure 2e and g) is already included.

244 When laser energy alone was used to predict behaviour (again using a decision tree), the performance  
245 of the classifier dropped to 55.4%. When laser energy was included alongside the full set of features  
246 used above, both the accuracy of the classifier and the features used were unchanged from previous  
247 results (73%, using peak amplitude, latency and voltage at t=210-240ms as features). This confirms  
248 that the LEP contributes information which could not be inferred from laser energy alone. Conversely,  
249 when the same approach was used to predict laser energy from LEP features, the success rate dropped  
250 to 54.0% using decision trees and 46.4-62.1% using other techniques (supplementary table 3) again  
251 indicating that additional information is present in the LEP beyond simple noxious stimulus intensity.

252 Finally, when the classifier was asked only to distinguish between no/low pain-like behaviour (scores  
253 0-2) or pain-like behaviour (scores 3-4), then performance improved to 86.2%. This compares  
254 favourably with previous studies, for example, Huang et al <sup>28</sup>, in which a Naïve Bayesian classifier was  
255 used to predict binary pain/no pain states across individuals with a success rate of ~80%.

256 This machine learning analysis was repeated using features from the EEG recording sites over left  
257 sensory cortex and left prefrontal cortex (supplementary table 4; also including data from pairs of  
258 sites). The resulting classifiers performed either comparably, or worse than the results from the vertex  
259 site alone.

260

### 261 [Bi-modal distribution of latencies in single LEP responses](#)

262 To better understand the criteria used for decision making by the classifier, the two principal features  
263 (vertex peak amplitude and latency) were plotted individually for each LEP event using the denoised  
264 data (Figure 4a-c). The peak amplitudes were generally low (<200 $\mu$ V) in the no response behavioural  
265 category, thus the classifier is able to categorise low amplitude events as likely belonging to the no  
266 response behaviour (first decision point). This representation of the data also reveals two distinct  
267 latency groupings for the remaining events, which is particularly apparent within the 'withdrawal'  
268 behavioural group (Figure 4a). This bimodal distribution is also visible at higher laser energies (Figure  
269 4b). The classifier identifies the short latency/high amplitude events occurring before ~180ms, which  
270 are almost uniformly in the withdrawal behaviour category. In contrast, the long latency, high

271 amplitude events are found in both the flinch and withdrawal behaviour group, an area which  
272 confuses the machine learning classifier and leads to poorer performance.

273 Further detailed analysis of the two latency groups was conducted on the LEPs where the animal  
274 showed a flinch or withdrawal response (using laser energies of 1 J and above, Figure 4c-f). K-means  
275 clustering of the LEP data (on the basis of amplitude and latency) identified two groups with short  
276 (group 1) and long latency (group 2) peaks. Short and long latency groups had mean peak latencies of  
277  $121\pm 3$  ms and  $223\pm 1$  ms respectively and were separated at a latency mid-point of 172 ms (Figure  
278 4c,d). Plotting single trial LEP waveforms from each group further highlights that LEP peaks do not fall  
279 onto a continuous spectrum of latencies but consist of two distinct groups (Figure 4e; Supplementary  
280 Figure 3). The proportion of short latency events is greater at higher laser energies (Figure 4f; Friedman  
281 test  $\chi^2(4)=$ ,  $p<0.01$ ), suggesting that the short latency events are more likely to be evoked by higher  
282 skin temperatures.

283 The frequency of double-peaked LEPs was also investigated (i.e. LEPs containing both short and long  
284 latency events), in case peaks at both latencies were present in individual events but had been  
285 overlooked by the analysis above. Each LEP was scanned for multiple peaks occurring between 25 and  
286 350ms, subject to the requirement of a minimum distance between individual peaks of 50ms and a  
287 minimum peak prominence (i.e. amplitude above baseline) of  $100\mu\text{V}$ . When multiple peaks were  
288 detected, the maximum peak was first identified. The LEP was then flagged as a potential double peak  
289 if any of the other peaks came within 75% of the maximum peak amplitude. Just 7% of LEP events fell  
290 into this category, indicating that the large majority (93%) of LEPs consist of a single peak.

291 The presence of these latency groupings was not readily apparent within the averaged LEPs (Figure  
292 2b,c). This is partly because the shorter latency events occur less frequently and therefore appear only  
293 as a 'shoulder' to the left of the main peak of averaged LEPs at the highest laser intensities.  
294 Importantly, an exploratory analysis showed that there was robust positive correlation between the  
295 hind paw withdrawal latencies and LEP latencies (Pearson's  $r=0.7$ ,  $p<0.001$ , Figure 4g), suggesting that  
296 there is a common mechanism underlying both endpoints (as assessed from the video data e.g.  
297 Supplementary Video 1). There was no significant correlation between paw withdrawal latency and  
298 LEP amplitude (Figure 4h). This provides further validation of the relevance of LEP latency to the pain-  
299 like behaviour.

300  
301  
302

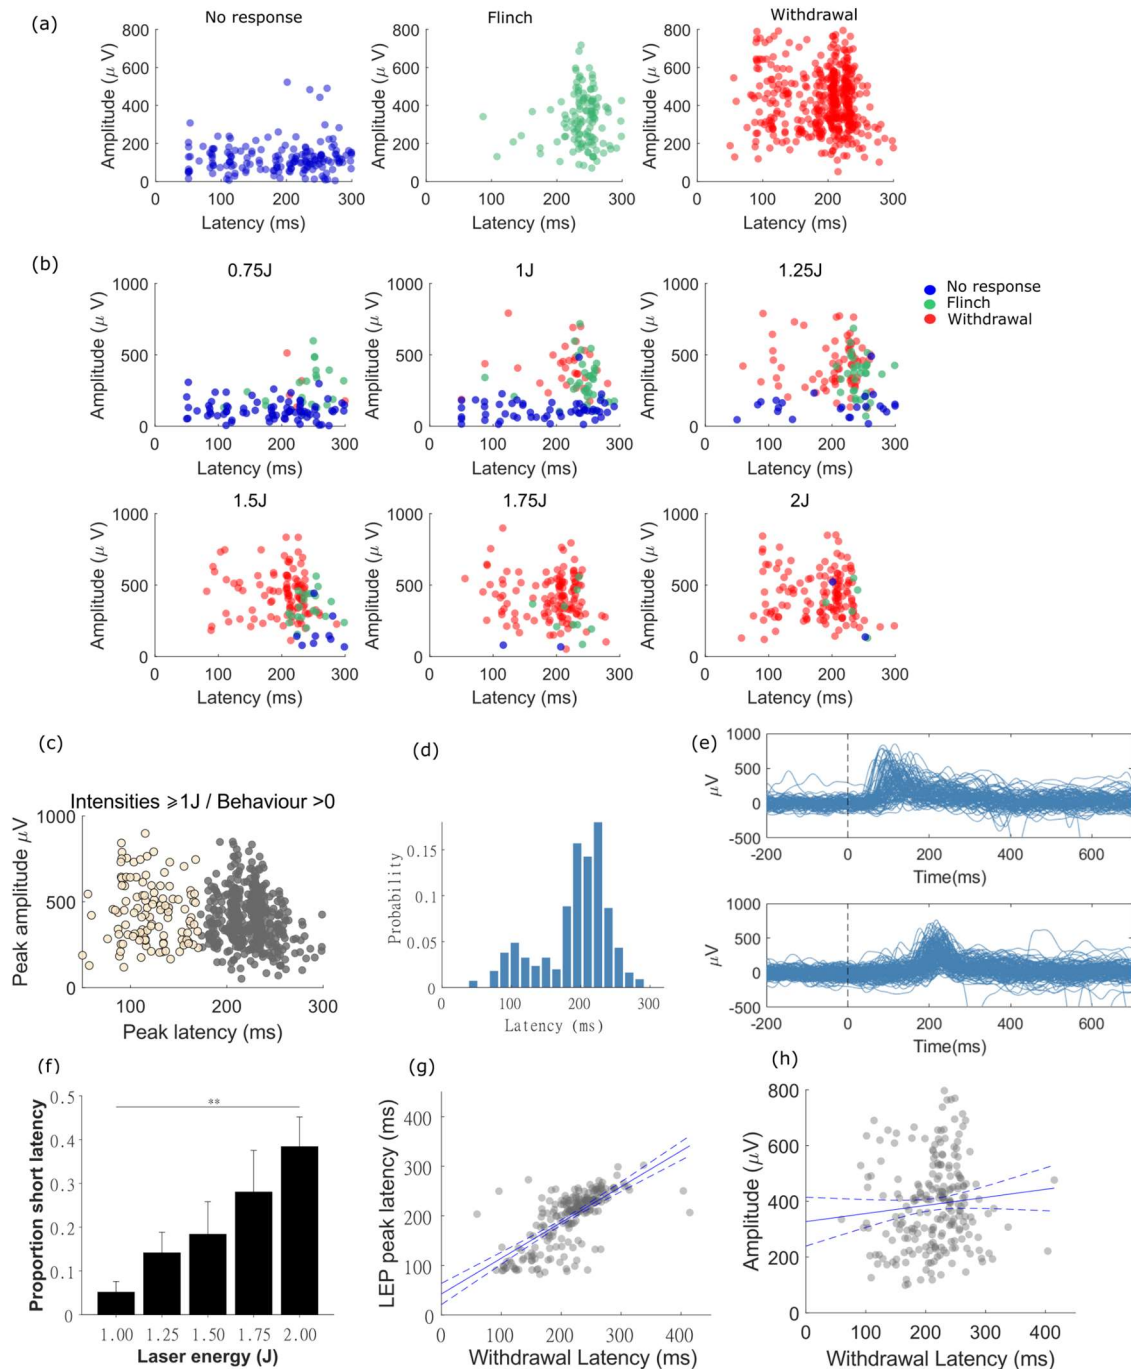

304 **Figure 4 LEPs grouped by latency and amplitude.** (a) denoised LEP peak amplitude and latency plotted  
 305 by behaviour, and (b) laser energy (behavioural response indicated by colours, as used in (a)) showing  
 306 the appearance of two groups at higher intensities/behavioural responses. (c) LEPs at energies  $\geq 1J$   
 307 and behavioural scores  $> 0$ , can be split using k-means clustering to form two groups (d) a bimodal  
 308 distribution is apparent in the probability histogram of latencies for this set reflecting the presence of  
 309 responses with short and long latencies centred at  $\sim 120$  and  $\sim 220$ ms (e) 150 randomly selected  
 310 examples of raw (non-denoised) LEPs identified as short (upper) or long (lower) latency using  
 311 denoising and k-means clustering. Note that both groups have single peaks at either short or long  
 312 latency and not both. (f) The proportion of short latency events increases with increasing laser  
 313 energies (Repeated-measures Friedman test, Dunn's correction). (g,h) Relationships between  
 314 withdrawal latencies and LEP latencies/amplitudes, with regression lines and 95% confidence  
 315 intervals. \*\*  $p < 0.01$ .

316

### 317 LEP latency differences reflect A $\delta$ - vs C-fibre transmission of nociceptive information

318 We hypothesised that the two latency groups could reflect the mode of transmission of nociceptive  
319 information from the periphery. Specifically, the two different latencies may indicate transmission via  
320 fast, myelinated A $\delta$ -fibres, or the (more frequent) activation of slower, unmyelinated C-fibres.  
321 Previous studies in rats have suggested that whilst C-fibre transmission of LEPs is more frequently  
322 observed, A $\delta$ -mediated events are also seen<sup>17,19,20</sup>. If this is the case, the differences in peak latencies  
323 between LEPs mediated by A $\delta$  or C-fibres should reflect the different speeds of transmission along  
324 these two fibre types:  $\sim 10\text{ms}^{-1}$  for A $\delta$ -fibres,  $\sim 0.75\text{ms}^{-1}$  for C-fibres<sup>29</sup>. By assuming a 10cm distance  
325 along the leg of an adult rat then the transmission latency will differ by  $\sim 120\text{ms}$  – similar to the  $\sim 100\text{ms}$   
326 difference between the mean latencies of the two groups of LEPs (Figure 4c).

327 In order to explore this hypothesis further, we sought to inhibit the C-fibre events using capsaicin, a  
328 TRPV1 agonist which ‘defunctionalises’ these axon terminals at high concentrations<sup>30,31</sup>, with the  
329 prediction that putative short latency, A $\delta$ -fibre mediated LEPs would be left intact (specifically, via  
330 capsaicin insensitive A $\delta$  mechano-heat fibres type 1 [AMH-I]<sup>17,32,33</sup>). LEPs were recorded before and 4,  
331 28 and 52 hours after intra-plantar capsaicin injected subcutaneously to the hind paw. A reduction in  
332 pain-like behaviour was seen following stimulation of the capsaicin-treated paw (n=6 responder  
333 animals, Figure 5a,b; supplemental figure 4b). Because the behavioural responses were stable across  
334 all post-capsaicin timepoints (Supplementary Figure 4a), their data were pooled into a single post-  
335 capsaicin dataset. The reduction in pain-like behaviour was also reflected in a reduction in the  
336 amplitude of the average LEP from all stimuli (supplemental figure 4c), but with an apparent  
337 preferential loss of the peak and retention of the early shoulder. To analyse this effect further we  
338 studied the post-capsaicin events that generated a behavioural flinch or withdrawal response. The  
339 features of these LEPs were markedly different relative to the pre-capsaicin set (Figure 5c), with a  
340 distinct peak appearing at the shorter latency of  $\sim 100\text{ms}$  and a corresponding proportional increase  
341 in short latency ( $t < 172\text{ms}$ ) LEP peaks from a mean of  $19 \pm 6\%$  to  $43 \pm 13\%$  on the treated side (Figure  
342 5d). This was reflected in a commensurate reduction in overall mean ERP latency (from  $206.6 \pm 6.3\text{ms}$   
343 before to  $161.1 \pm 9.5\text{ms}$  after capsaicin,  $p < 0.001$ , Figure 5e). This suggests that the predominant  
344 mechanism underlying LEP generation was changed post-capsaicin administration; it is likely that a  
345 greater proportion of the remaining withdrawal responses were associated with A $\delta$ -fibre mediated  
346 LEPs.

347

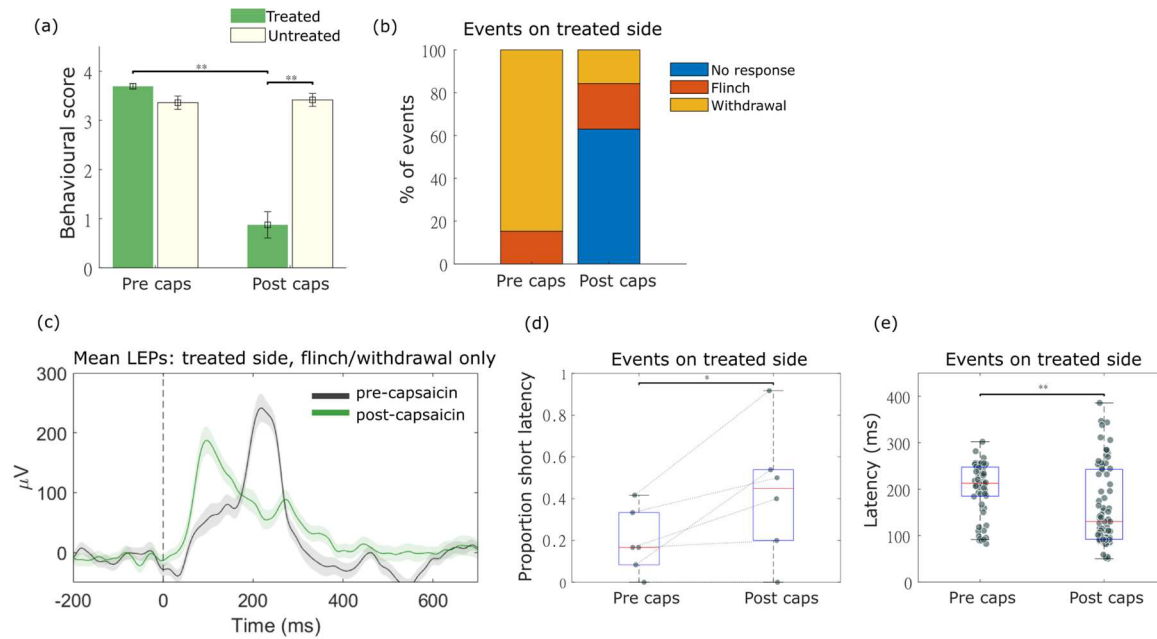

348

349 **Figure 5 LEPs and capsaicin.** (a) behavioural scores following 1.5J laser stimulation of the capsaicin-  
350 treated foot (green bars) and the untreated foot (blue bars), repeated measures ANOVA with time  
351 and side as within subject factors, Bonferroni correction for repeated comparisons. (b) Capsaicin  
352 caused many more 'no response' events. (c) The mean raw (not denoised) LEP before and after  
353 capsaicin restricted to trials where a behavioural response remained, shows a flattening of the original  
354 peak at ~250ms and introduction of a prominent peak at ~100ms post capsaicin. (d) Mean latency of  
355 LEP peaks for each animal, before and after capsaicin. The proportion of short latency (peak latency <  
356 0.172s) events showed a significant increase post-capsaicin (Lilliefors test for normality, paired t-test.  
357 (e) LEP peak latencies for all events, not grouped by animals, showing a significant reduction in overall  
358 latency, and a greater proportion of events at shorter latencies (as visible in (c), Lilliefors test for  
359 normality, Wilcoxon rank-sum test).

360

361

## 362 Discussion

363 Our starting point for this study was to ask whether the rat LEP had validity as a translational  
364 biomarker of pain and to identify the features that could be most informative. The results from our  
365 study suggest that variations in LEP features, such as peak amplitude, reflect pain-related behaviour  
366 in naïve rats. In particular, the amplitude of the main vertex peak at ~250ms in averaged LEPs  
367 correlated strongly with behavioural response – even when laser energy was held constant. This  
368 indicates that the LEP encodes aspects of the decision-making process around pain-like behaviour  
369 rather than being a simple proxy of stimulus intensity or sensory input. This is consistent with the  
370 conclusions of previous studies in both humans and rodents<sup>12,34</sup>.

371 We deployed a machine learning approach to ask whether this relationship could be used to predict  
372 behavioural response from single-trial EEG data. A coarse decision tree classifier was able to predict

373 the behavioural response associated with individual LEPs to an accuracy of 73% (with particular  
374 success in discriminating no response from withdrawals (~90% accuracy)). We found the optimal  
375 classifier used both amplitude and latency features of single LEPs. It was apparent that the latency of  
376 LEP peaks followed a bimodal distribution - with around ~30% of events occurring at a shorter latency  
377 of ~120ms, a result not initially evident in the averaged LEPs. This indicates that when averaging takes  
378 place, meaningful differences in the form of LEP responses to individual stimuli are lost. This is  
379 particularly the case when only a subset of events – here, the short latency events – differ in  
380 morphology. The appearance of this set of LEPs at the higher laser intensities/behavioural responses  
381 manifests only as a small ‘shoulder’ on the side of the main peak in averaged data (visible in Figure 1d  
382 and e). Interestingly the inclusion of LEP data from other EEG recording sites or frequency power  
383 spectrum data did not improve the performance of the classifier, indicating that they did not carry  
384 additional information that was better able to discriminate between behavioural responses. The main  
385 area where the classifier performance could be improved is in distinguishing between flinch and  
386 withdrawal responses, and future studies will be needed to assess whether this could be better  
387 achieved for example by the inclusion of local field potential data from sites believed to encode pain  
388 intensity and aversiveness such as the insula or amygdala whose activity is not captured in surface  
389 EEG recordings.

390 As predicted based on LEP studies in humans<sup>35,36</sup>, peripheral application of capsaicin (causing  
391 defunctionalisation of C-fibres<sup>30</sup>) resulted in a large reduction in the amplitude of the LEP. This was  
392 accompanied by a significant reduction in the number of withdrawal responses to a given intensity of  
393 laser stimulation. These effects were predominantly driven by a reduction in putative C-fibre  
394 responses, with A $\delta$  responses largely spared (and therefore contributing a greater proportion of the  
395 remaining responses). It is likely that capsaicin-insensitive AMH-I fibres are a significant contributor to  
396 these remaining events, however the majority of the remaining responses are still in the C-fibre  
397 latency range. Comparable studies in humans have typically observed complete loss of LEP responses,  
398 however these studies used multiple rounds of capsaicin application over several days to ensure near-  
399 complete denervation of the epidermis<sup>35,36</sup>, a difference which may explain the small number of  
400 responses remaining here (where a single capsaicin application was used). Studies in humans have  
401 also demonstrated that capsaicin-induced desensitisation of A $\delta$ -mediated, laser-evoked responses is  
402 restricted to the area of capsaicin application, whereas C-fibre desensitisation covers a larger area,  
403 likely due to the larger receptive fields of C-fibres<sup>37</sup>. Consequently, some of the remaining A $\delta$ -  
404 mediated responses in rats may also be due to inadvertent stimulation of fibres that were not directly  
405 exposed to capsaicin, a phenomenon that is much less likely for C-fibres. The finding that both A $\delta$  and  
406 C-fibres are likely to contribute to the LEP in rodents is in contrast to previous studies using averaged



407 data, which have concluded that in rats LEPs are mediated only by C-fibres<sup>11,13</sup>. However it is in  
408 agreement with a number of studies using a range of methodologies that have indicated a role for A $\delta$ -  
409 fibres in thermal nociception in rodents<sup>17-22</sup>. Our results suggest that the latencies of individual LEP  
410 peaks convey information about the mode of transmission of nociceptive information from the  
411 periphery.

412 Interestingly there appeared to be a mutual exclusivity in the single LEP responses with either a short  
413 latency or a long latency peak (an effect seen both within and across animals) with little evidence for  
414 peaks at both A $\delta$  and C-fibre latencies (likely overestimated at ~7% of all LEPs due to inclusion of some  
415 peaks that were the product of noise). The size of the illuminating laser spot is relatively large (4mm  
416 diameter) meaning it is unlikely to be a simple case of stochastic activation of one afferent terminal  
417 class or the other based on small variations in the location of stimulation. Rather it is likely consistent  
418 with the observation that the threshold for thermal activation of A $\delta$ -fibres is higher than that of C-  
419 fibres<sup>19-21</sup>, and so are less likely to be activated. However, when A $\delta$ -fibres are engaged their activity  
420 precedes and is powerful enough to dominate the C-fibre nociceptive barrage and drive behaviour  
421 and the LEP. A similar bimodal distribution of short and long latency withdrawals (presumed A $\delta$  and  
422 C-fibre mediated) has been noted in mice with selective optoactivation of classes of primary afferent,  
423 and particularly relevant to our study, to those expressing TRPV1<sup>38</sup>. Browne & colleagues<sup>38</sup> suggested  
424 that the two subsets of behavioural response were due to intrinsic properties of the afferents and  
425 their transmission pathways in the CNS, rather than reflecting differences in the transduction  
426 mechanism. It has also been proposed that A $\delta$  input may transiently inhibit C-fibre mediated  
427 nociceptive drive on to spinothalamic tract neurons<sup>39</sup>. This may account for the observation in humans  
428 that a C-fibre LEP is only seen when the A $\delta$  LEP is blocked<sup>1,15</sup>. Alternatively, similar occlusion of the  
429 human ultra-late C-fibre mediated potential by A $\delta$  activation has been suggested to be due to a  
430 cortical refractory state<sup>1,2,40</sup>. While the precise mechanism is uncertain based on our studies, this  
431 property again emphasises the cross species similarity in processing. We speculate this mutual  
432 exclusivity in the circuit organisation could act to prevent the generation of two sequential motor  
433 withdrawal responses to a given stimulus which would be unlikely to convey an advantage and may  
434 impair/delay co-ordinated locomotor escape behaviour.

435 Our findings extend the potential translational validity and utility of rodent LEPs by demonstrating the  
436 presence of both C- and A $\delta$ -fibre mediated responses in conscious behaving animals. This has  
437 previously required the use of anaesthetised preparations where a carefully graded heat stimulus  
438 could be delivered. Indeed, we note that the ability to discriminate between these two pathways of  
439 nociceptive transmission by using single-trial LEP analysis increases the level of mechanistic insight.  
440 This may allow the profiling of pharmacological activity in a fibre-specific manner, adding additional

441 evidence of target engagement, as was demonstrated here for topical capsaicin. As another example,  
442 analgesics targeting the  $\text{Na}_v1.8$  channel<sup>41,42</sup> (found predominantly in C-fibres<sup>43–45</sup>) would also be  
443 predicted to reduce the C-fibre component of remaining LEPs, whilst leaving the  $\text{A}\delta$  component intact.

444 In summary, the findings described here indicate that rat LEPs have a set of characteristic properties  
445 that support them being a useful, translatable measure of pain. Furthermore, adoption of the single  
446 trial analysis, machine learning and wavelet filtering approaches may help to identify further novel  
447 and important mechanistic features of interest across species.

## 448 Materials and Methods

### 449 Animals

450 All experiments were performed in accordance with the United Kingdom Animals (Scientific  
451 Procedures) Act 1986 with approval from the United Kingdom Home Office and local Animal Welfare  
452 and Ethical Review Board (Eli Lilly). Studies were conducted on a total of 12 adult, male Wistar rats  
453 (345-387g on date of surgery) who were individually housed on a 12 hour light/dark cycle with food  
454 and water provided ad libitum.

### 455 Surgical implantation for EEG recordings

456 Each rat was anaesthetised with isoflurane and implanted with an array of four stainless steel EEG  
457 skull screws (00-96x1/16 Plastics One, USA). The four recording positions were located over: motor  
458 cortex (AP +3.5mm, ML -2.0mm); vertex/cingulate cortex (AP -1.5mm, ML 0.0mm); primary  
459 somatosensory cortex - hindlimb region (AP -1.9mm, ML -2.6mm) and visual cortex (AP -6.6mm, ML  
460 +4.2mm) [all measurements relative to Bregma]. In addition three depth electrodes (200 $\mu\text{m}$  insulated  
461 silver wire, Advent Research Materials Ltd, UK) were inserted to: insular cortex (AP +2.8mm, ML  
462 +3.9mm, DV -3.9mm); infralimbic cortex (AP +2.7mm, ML +0.6mm, DV -4.2mm) and Amygdala (AP -  
463 1.9mm, ML +4.0mm DV -7.5mm) [AP/ML measurements relative to Bregma, negative ML values  
464 represent Left side, DV measurements relative to brain surface] connected to a 12 channel circular  
465 connector (Omnetics Connector Corporation, USA). An additional screw was placed in the occipital  
466 bone and acted as the ground electrode. Note that the EEG site over motor cortex and the depth  
467 electrodes were not used in the analysis above. Light-curable composite (Revolution Formula 2, Kerr  
468 Dental, USA) was used to bind the implant to the skull. The analgesic Carprofen (5mg/Kg SC) was  
469 administered at the end of surgery and on the morning of the first postoperative day, with subsequent  
470 analgesia provided by Meloxicam (1mg/kg PO) on each of the first 7 days post-surgery. The  
471 prophylactic antibiotic (Sulfatrim PO [4.8mg/Kg Trimethoprim & 24mg/Kg Sulfamethoxazole]) was  
472 administered twice daily from the morning of surgery to 7 days postoperatively. Rats were given a  
473 minimum period of 14 days following surgery before undergoing further experimental procedures.

474

## 475 Experimental protocol

476 The experiments were performed in a custom-built enclosure (Apogee Engineering Analysis Solutions  
477 Ltd, UK), consisting of an upper chamber with four individual compartments for rats, and a lower  
478 chamber where the fibre-optic cable from an 1340nm wavelength Nd:YAP laser (Stimul 1340,  
479 Electronical Engineering Group, Italy) terminated. The floor of the rodent compartments was  
480 constructed of borosilicate glass, through which the laser beam could pass. The primary Nd:YAP laser  
481 could be targeted by visualising a low power laser (635nm wavelength) on the under-surface of the  
482 rat using a USB camera connected to a PC. The position of the laser was adjusted using a joystick-  
483 controlled motorised xy-stage (Iigus GmbH). For all experiments, the laser stimuli (diameter: 4mm;  
484 duration: 4ms) were delivered to the centre of the plantar surface, alternating between left/right hind-  
485 paws (interstimulus interval: >30s).

486 Rats were habituated to the apparatus for 5 days before the stimulus response protocol commenced.  
487 The protocol was split across 4 recording sessions, with an inter-session interval of at least one day.  
488 Within each session, rats were exposed to 18 laser stimuli at 6 different intensities (0.75, 1.00, 1.25,  
489 1.50, 1.75 & 2.00J). Stimuli were presented in blocks of 3 of the same intensity according to a balanced  
490 design. At the end of each session, a further 3x 2J stimuli were applied to either the dividing walls  
491 between the rats (sessions 1 & 2), or to the ceiling of the enclosure (sessions 3 & 4) as a control for  
492 potential auditory evoked responses. EEG data was acquired at a sampling rate of 19.525kHz (filtered  
493 0.35 - 9700Hz) using wireless TAINI transmitters (TainiTec Ltd, UK)<sup>48</sup>.

494 For the exploratory capsaicin experiment, 10 animals retained high quality EEG data and were included  
495 in the study. Recordings were performed across four days, with two sessions per day, four hours apart.  
496 During each session, rats were stimulated by the laser on the plantar surface of the hind paw (12  
497 stimulations per paw, alternating left/right) at an energy level of 1 and 1.5J in sessions 1 and 2  
498 respectively. Immediately prior to the first recording session on day 2, rats were injected  
499 subcutaneously with capsaicin (20µg in 100µl DMSO) in the plantar surface of the hind paw (randomly  
500 allocated to left/right paw in a balanced manner). Five of the rats showed evidence of  
501 defunctionalisation with a reduction in behavioural responses to laser stimulation (1.5J) and were  
502 included in this exploratory analysis.

## 503 Behavioural scores

504 Behavioural responses were recorded for each stimulus application by the experimenter based on the  
505 following scale: 0: no response, 1: flinch (or some sign of awareness of the stimulus), 2: transient foot  
506 lift, 3: withdrawal and large body movement, 4: withdrawal and licking.

507 A repeated measures ANOVA was used to analyse the relationship between mean behavioural score  
508 and laser energy (with energy and side of stimulation as within-subject factors and mean behavioural  
509 score calculated for each animal at a given laser energy/side).

#### 510 Pre-processing of EEG

511 EEG was processed and analysed using custom MATLAB scripts. Missing samples in the EEG data  
512 caused by errors during wireless transmission were linearly interpolated in MATLAB and the resulting  
513 signal high-pass filtered (zero-phase offset, 2nd order Butterworth filter; cut-off 0.35Hz) to remove  
514 the DC offset. Signals were then low-pass filtered (zero-phase offset, 2nd order Butterworth filter; cut-  
515 off 250Hz) and segments of data  $\pm 5s$  around each laser stimulation extracted. Each window of data  
516 underwent further basic pre-processing to remove noise and artefacts. Samples over a threshold level  
517 of  $750\mu V$  were removed and replaced with linearly interpolated values using MATLAB's built in  
518 interpolation function 'interp1'. Trials where there was more than 0.1s of interpolation, or where  
519 there were more than 10 discrete segments of interpolation in the period immediately adjacent to the  
520 laser stimulus (-0.5 to 0.7s) were excluded. Each event was baseline normalised by subtracting the  
521 mean EEG voltage from the 0.5s preceding the laser stimulation from all samples.

522 For analysis of the LEP peak features, data was additionally downsampled by a factor of 5 (from  
523 19525Hz and low pass filtered with a cut off of 30Hz using a zero-phase offset, 3<sup>rd</sup> order Butterworth  
524 filter (built in MATLAB function 'butter'). For analysis of power in the delta (0.5-5Hz), gamma (50-  
525 100Hz) and theta (5-12Hz) frequency ranges, raw data was bandpass filtered using a 2<sup>nd</sup> order  
526 Butterworth filter; the power was calculated using a Hilbert transform. Baseline power was calculated  
527 as the mean of the power in the 2 seconds prior to the laser event.

#### 528 Analysis of average LEPs

529 Mean LEPs were calculated using all events in a specified category (i.e. with a given laser energy or  
530 behavioural response) . This averaged LEP was then used to extract the peak amplitude and latency.  
531 The peak was identified as the maximum point occurring within an event window of 0.05-0.35s  
532 following the laser stimulus. One way repeated measures ANOVA were used to analyse the variation  
533 in peak amplitude or latency, using either behavioural score or laser energy as within subject factors.  
534 For comparisons using either fixed behavioural response or laser energy; the laser energy was grouped  
535 for analysis into three categories to match the three categories used for behaviour; these were 0.75-  
536 1J, 1.25-1.5J, 1.75-2J.

537 For calculations of power spectrum characteristics, the change in power over the event window  
538 (relative to the mean over a 5 second baseline) was calculated for each individual laser stimulus. Power

539 curves were then averaged within categories (i.e. for a given animal and laser energy / behaviour) .  
540 The peak and latency of these curves were then analysed in the same way as the LEP peaks.

#### 541 Potential for laser generation of auditory evoked potentials

542 It has been reported that rodent LEPs can be contaminated by fast auditory evoked potentials (AEPs)  
543 <sup>11</sup>. These are proposed to result from ultrasonic sounds generated by the rapid skin heating caused  
544 by laser stimulation). To test for the potential contribution of AEPs to the LEP waveforms, EEG  
545 responses were also recorded while the laser was targeted at the base of the dividing walls separating  
546 the rats. This generated obvious AEPs which were clearly distinct from the paw stimulus triggered LEPs  
547 in both timing and morphology (Supplementary Figure 1, the grand averaged AEP has a small positive  
548 peak at ~50ms, of amplitude 100 $\mu$ V – this clearly precedes the LEP peaks found at 200ms, Figure 2a-  
549 d). This provides confidence that recorded LEPs were not contaminated by (or confused with) AEPs.

#### 550 Analysis of single trials and use of machine learning algorithms

551 Single trial LEPs were denoised using the EP\_DEN software described in Ahmadi et al <sup>27</sup>. Briefly, the  
552 method uses a dataset of multiple event related potentials (ERPs - here these are LEPs) to calculate  
553 the coefficients of wavelet components relevant to the post-event ERP, using a baseline period as a  
554 comparator. Individual ERPs provided to the software are then reconstructed using only these  
555 ‘informative’ wavelet components, removing background noise.

556 Raw LEPs were resampled from a sampling rate of 19525Hz to 10923Hz using the MATLAB function  
557 ‘resample’. This was done in order to make the length of the entire signal equal to a power of 2 (here,  
558 2<sup>15</sup> samples) as required by the EP\_DEN software. To calculate wavelet coefficients, the entire dataset  
559 of resampled LEPs across all animals, intensities and behaviours was provided to the EP\_DEN software,  
560 which returned denoised LEPs, alongside values of the primary peak amplitude and latency for each  
561 event. These values of amplitude and latency were then used as part of the feature set to train the  
562 classifiers. For single trial binned voltage values, a moving average filter was applied the denoised data  
563 using a window of 30ms. Samples of this averaged data were acquired from 30ms bins between 0.03  
564 and 0.55s relative to the laser stimulus. Changes in spectral characteristics for individual events were  
565 calculated by bandpass filtering and Hilbert transforming raw data (in MATLAB), then calculation of  
566 the amplitude of the change in power relative to baseline. Feature sets were normalised by  
567 subtracting the mean and dividing by the standard deviation before being used in training.

568 Coarse decision trees were trained on the feature set using the built-in MATLAB function ‘fitctree’,  
569 with 5-fold cross validation, and a minimum leaf size of 15. The accuracy, confusion matrix (including  
570 the recall and precision statistics shown) were extracted from the fitted model and were calculated  
571 using only examples which were not used in training. The final model (shown in Figure 3) was trained

572 using all available data. All other machine learning algorithms were trained using built in models in  
573 the MATLAB classifier toolbox GUI. When classifiers were trained to predict laser energy, the dataset  
574 was combined into 3 groups of intensities (0.75-1J, 1.25-1.5J, 1.75-2J) to create a comparable  
575 condition to that used when classifying the 3 behavioural responses.

576 K-means clustering by peak amplitudes/latencies used the MATLAB function 'kmeans', using two  
577 groups. The threshold between the two groups was calculated as the midpoint between the longest  
578 peak of the short latency events and the earliest peak of the long latency event group.

579 When calculating the proportion of fast events at each laser energy, only two rats exhibited at least 6  
580 valid responses at 0.75J (e.g. due to noise, or lack of behavioural response), and so this energy level  
581 was removed from this analysis due to the inaccuracy of subsequently calculated parameters. Across  
582 the remaining energy levels, n=5 (of 12) rats were excluded as they did not exhibit a minimum of 6  
583 valid events at each energy level. Remaining data was analysed using a Friedman test (repeated  
584 measures; GraphPad Prism v9.2.0)

585

586

## Acknowledgements

587

The authors wish to thank Professor Luis Garcia-Larrea for providing helpful feedback on the

588

manuscript.

589

## Competing interests

590

This project has received funding from the Innovative Medicines Initiative 2 Joint Undertaking under

591

grant agreement No [777500]. This Joint Undertaking receives support from the European Union's

592

Horizon 2020 research and innovation programme and EFPIA.

593

The statements and opinions presented here reflect the author's view and neither IMI nor the

594

European Union, EFPIA, or any Associated Partners are responsible for any use that may be made of

595

the information contained therein.

596

## References

1. Bromm, B. & Treede, R. D. Human cerebral potentials evoked by CO<sub>2</sub> laser stimuli causing pain. *Exp. brain Res.* **67**, 153–62 (1987).
2. Bromm, B. & Treede, R. D. Nerve fibre discharges, cerebral potentials and sensations induced by CO<sub>2</sub> laser stimulation. *Hum. Neurobiol.* **3**, 33–40 (1984).
3. Iannetti, G. D., Hughes, N. P., Lee, M. C. & Mouraux, A. Determinants of laser-evoked EEG responses: pain perception or stimulus saliency? *J. Neurophysiol.* **100**, 815–28 (2008).
4. Iannetti, G. D. *et al.* Evidence of a specific spinal pathway for the sense of warmth in humans. *J. Neurophysiol.* **89**, 562–70 (2003).
5. Edwards, L., Inui, K., Ring, C., Wang, X. & Kakigi, R. Pain-related evoked potentials are modulated across the cardiac cycle. *Pain* **137**, 488–494 (2008).
6. Krahé, C., Drabek, M. M., Paloyelis, Y. & Fotopoulou, A. Affective touch and attachment style modulate pain: a laser-evoked potentials study. *Philos. Trans. R. Soc. Lond. B. Biol. Sci.* **371**, 20160009 (2016).
7. Weiss, T. *et al.* How do brain areas communicate during the processing of noxious stimuli? An analysis of laser-evoked event-related potentials using the Granger causality index. *J. Neurophysiol.* **99**, 2220–31 (2008).
8. Hu, L. & Iannetti, G. D. Neural indicators of perceptual variability of pain across species. *Proc. Natl. Acad. Sci. U. S. A.* **116**, 1782–1791 (2019).
9. Lee, M. C., Mouraux, A. & Iannetti, G. D. Characterizing the cortical activity through which pain emerges from nociception. *J. Neurosci.* **29**, 7909–16 (2009).
10. Carmon, A., Friedman, Y., Cogger, R. & Kenton, B. Single trial analysis of evoked potentials to noxious thermal stimulation in man. *Pain* **8**, 21–32 (1980).
11. Hu, L. *et al.* Was it a pain or a sound? Across-species variability in sensory sensitivity. *Pain* **156**, 2449–2457 (2015).
12. Xia, X. L., Peng, W. W., Iannetti, G. D. & Hu, L. Laser-evoked cortical responses in freely-moving rats reflect the activation of C-fibre afferent pathways. *Neuroimage* **128**, 209–217 (2016).
13. Peng, W. *et al.* Brain oscillations reflecting pain-related behavior in freely moving rats. *Pain* **159**, 106–118 (2018).
14. Chen, A. C. N., Arendt-Nielsen, L. & Plaghki, L. Laser-evoked potentials in human pain. *Pain Forum* **7**, 174–184 (1998).
15. Plaghki, L. & Mouraux, A. Brain responses to signals ascending through C-fibers. *Int. Congr. Ser.* **1232**, 181–192 (2002).
16. Cruccu, G. *et al.* Recommendations for the clinical use of somatosensory-evoked potentials. *Clinical Neurophysiology* **119**, 1705–1719 (2008).
17. McMullan, S., Simpson, D. A. A. & Lumb, B. M. A reliable method for the preferential activation of C- or A-fibre heat nociceptors. *J. Neurosci. Methods* **138**, 133–139 (2004).
18. Yeomans, D. C. & Proudfit, H. K. Nociceptive responses to high and low rates of noxious cutaneous heating are mediated by different nociceptors in the rat: electrophysiological evidence. *Pain* **68**, 141–150 (1996).



- 638 19. Devor, M., Carmon, A. & Frostig, R. Primary afferent and spinal sensory neurons that respond  
639 to brief pulses of intense infrared laser radiation: A preliminary survey in rats. *Exp. Neurol.* **76**,  
640 483–494 (1982).
- 641 20. Lynn, B. & Shakhaneh, J. Properties of A delta high threshold mechanoreceptors in the rat  
642 hairy and glabrous skin and their response to heat. *Neurosci. Lett.* **85**, 71–6 (1988).
- 643 21. Kalliomäki, J., Weng, H. R., Nilsson, H. J. & Schouenborg, J. Nociceptive C fibre input to the  
644 primary somatosensory cortex (SI). A field potential study in the rat. *Brain Res.* **622**, 262–70  
645 (1993).
- 646 22. Shaw, F. Z., Chen, R. F. & Yen, C. T. Dynamic changes of touch- and laser heat-evoked field  
647 potentials of primary somatosensory cortex in awake and pentobarbital-anesthetized rats.  
648 *Brain Res.* **911**, 105–15 (2001).
- 649 23. Qiao, Z.-M., Wang, J.-Y., Han, J.-S. & Luo, F. Dynamic processing of nociception in cortical  
650 network in conscious rats: a laser-evoked field potential study. *Cell. Mol. Neurobiol.* **28**, 671–  
651 687 (2008).
- 652 24. Mouraux, A. & Iannetti, G. D. Across-trial averaging of event-related EEG responses and  
653 beyond. *Magn. Reson. Imaging* **26**, 1041–54 (2008).
- 654 25. Quian Quiroga, R. Obtaining single stimulus evoked potentials with wavelet denoising. *Phys.*  
655 *D Nonlinear Phenom.* **145**, 278–292 (2000).
- 656 26. Ronga, I., Valentini, E., Mouraux, A. & Iannetti, G. D. Novelty is not enough: laser-evoked  
657 potentials are determined by stimulus saliency, not absolute novelty. *J. Neurophysiol.* **109**,  
658 692–701 (2013).
- 659 27. Ahmadi, M. & Quian Quiroga, R. Automatic denoising of single-trial evoked potentials.  
660 *Neuroimage* **66**, 672–80 (2013).
- 661 28. Huang, G. *et al.* A novel approach to predict subjective pain perception from single-trial laser-  
662 evoked potentials. *Neuroimage* **81**, 283–293 (2013).
- 663 29. Joong Woo Leem, Willis, W. D. & Jin Mo Chung. Cutaneous sensory receptors in the rat foot.  
664 *J. Neurophysiol.* **69**, 1684–1699 (1993).
- 665 30. Anand, P. & Bley, K. Topical capsaicin for pain management: therapeutic potential and  
666 mechanisms of action of the new high-concentration capsaicin 8% patch. *Br. J. Anaesth.* **107**,  
667 490–502 (2011).
- 668 31. McMahon, S. B., Lewin, G. & Bloom, S. R. The consequences of long-term topical capsaicin  
669 application in the rat. *Pain* **44**, 301–310 (1991).
- 670 32. Ringkamp, M. *et al.* Capsaicin responses in heat-sensitive and heat-insensitive A-fiber  
671 nociceptors. *J. Neurosci.* **21**, 4460–4468 (2001).
- 672 33. Nagy, I. & Rang, H. Noxious heat activates all capsaicin-sensitive and also a sub-population of  
673 capsaicin-insensitive dorsal root ganglion neurons. *Neuroscience* **88**, 995–997 (1999).
- 674 34. Treede, R. D., Lorenz, J. & Baumgärtner, U. Clinical usefulness of laser-evoked potentials.  
675 *Neurophysiol. Clin.* **33**, 303–314 (2003).
- 676 35. Ragé, M. *et al.* The time course of CO<sub>2</sub> laser-evoked responses and of skin nerve fibre  
677 markers after topical capsaicin in human volunteers. *Clin. Neurophysiol.* **121**, 1256–1266  
678 (2010).

- 679 36. La Cesa, S. *et al.* Skin denervation does not alter cortical potentials to surface concentric  
680 electrode stimulation: A comparison with laser evoked potentials and contact heat evoked  
681 potentials. *Eur. J. Pain (United Kingdom)* **22**, 161–169 (2018).
- 682 37. van Neerven, S. G. A. & Mouraux, A. Capsaicin-Induced Skin Desensitization Differentially  
683 Affects A-Delta and C-Fiber-Mediated Heat Sensitivity. *Front. Pharmacol.* **11**, 1–15 (2020).
- 684 38. Browne, L. E. *et al.* Time-Resolved Fast Mammalian Behavior Reveals the Complexity of  
685 Protective Pain Responses. *Cell Rep.* **20**, 89–98 (2017).
- 686 39. Chung, J. M., Lee, K. H., Hori, Y., Endo, K. & Willis, W. D. Factors influencing peripheral nerve  
687 stimulation produced inhibition of primate spinothalamic tract cells. *Pain* **19**, 277–293 (1984).
- 688 40. Magerl, W., Ali, Z., Ellrich, J., Meyer, R. A. & Treede, R.-D. C- and A delta-fiber components of  
689 heat-evoked cerebral potentials in healthy human subjects. *Pain* **82**, 127–137 (1999).
- 690 41. Urru, M. *et al.* Dexpramipexole blocks Nav1.8 sodium channels and provides analgesia in  
691 multiple nociceptive and neuropathic pain models. *Pain* **161**, 831–841 (2020).
- 692 42. Dekker, L. V. & Cronk, D. Nav1.8 as a drug target for pain. in *Sodium Channels, Pain, and*  
693 *Analgesia* 123–143 (Birkhäuser-Verlag, 2005). doi:10.1007/3-7643-7411-x\_7
- 694 43. Sangameswaran, L. *et al.* Structure and function of a novel voltage-gated, tetrodotoxin-  
695 resistant sodium channel specific to sensory neurons. *J. Biol. Chem.* **271**, 5953–5956 (1996).
- 696 44. Akopian, A. N., Sivilotti, L. & Wood, J. N. A tetrodotoxin-resistant voltage-gated sodium  
697 channel expressed by sensory neurons. *Nature* **379**, 257–262 (1996).
- 698 45. Yaksh, T. L. A review of pain-processing pharmacology. in *Practical Management of Pain: Fifth*  
699 *Edition* 99–112 (Elsevier Inc., 2013). doi:10.1016/B978-0-323-08340-9.00009-8
- 700 46. Mathis, A. *et al.* DeepLabCut: markerless pose estimation of user-defined body parts with  
701 deep learning. *Nat. Neurosci.* **21**, 1281–1289 (2018).
- 702 47. Hu, L., Zhang, Z. G., Mouraux, A. & Iannetti, G. D. Multiple linear regression to estimate time-  
703 frequency electrophysiological responses in single trials. *Neuroimage* **111**, 442–53 (2015).
- 704 48. Jiang, Z. *et al.* TaiNi: Maximizing research output whilst improving animals' welfare in  
705 neurophysiology experiments. *Sci. Rep.* **7**, 8086 (2017).

706

707

708

## Supplementary figures

709

710

711

(a) Example audio evoked potential (AEP) / laser evoked potential (LEP)

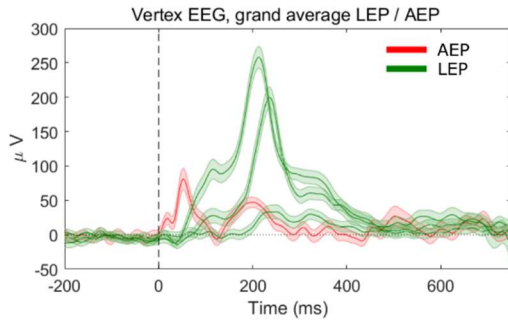

(b) Changes in power at vertex EEG

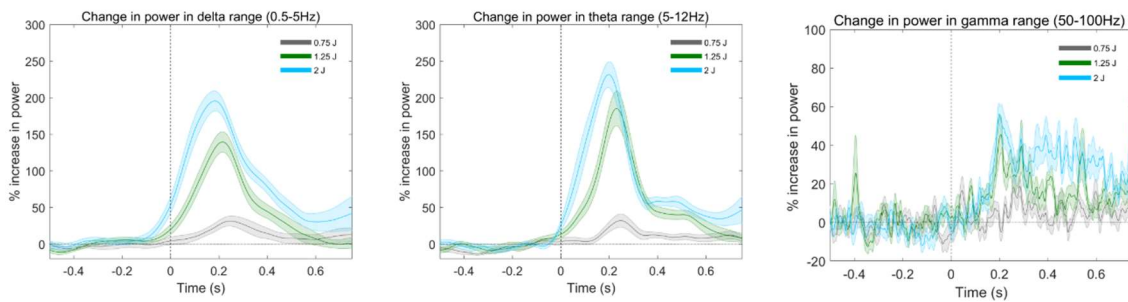

712

713

714

715

716

717

**Supplementary Figure 1.** (a) mean auditory evoked potential across all animals, generated by targeting the laser onto a metallic surface near the animal. The form of the auditory evoked potential is distinct from the LEP, with a peak at ~50ms (b) changes in power in the delta, theta and gamma range at varying laser intensities.

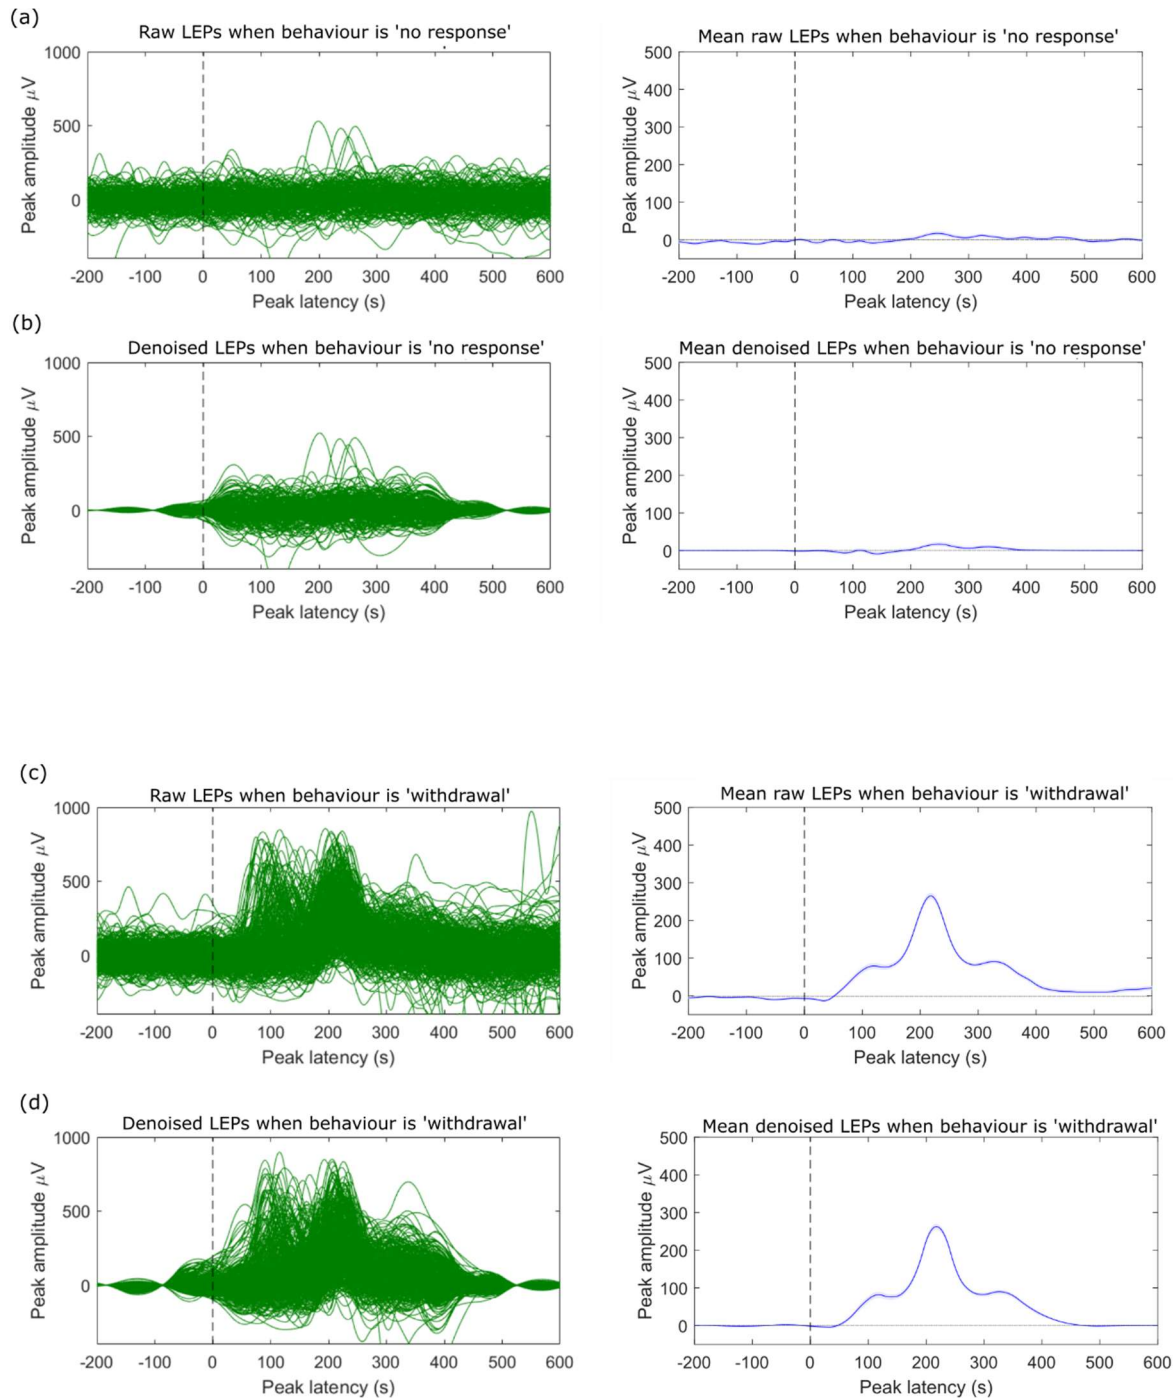

718

719

720

721

722

723

724

725

**Supplementary Figure 2.** (a-b) For behaviours classified as no response, most individual vertex LEPs do not rise above the noise (left hand plots). Little/no clear peak is apparent in the mean of either the raw or denoised data.(c-d) For the withdrawal responses, peaks rise clearly above the noise in both raw and denoised versions. Note that in the averaged data for these LEPs, the two groups of peaks have merged into one peak with 'shoulders' either side.

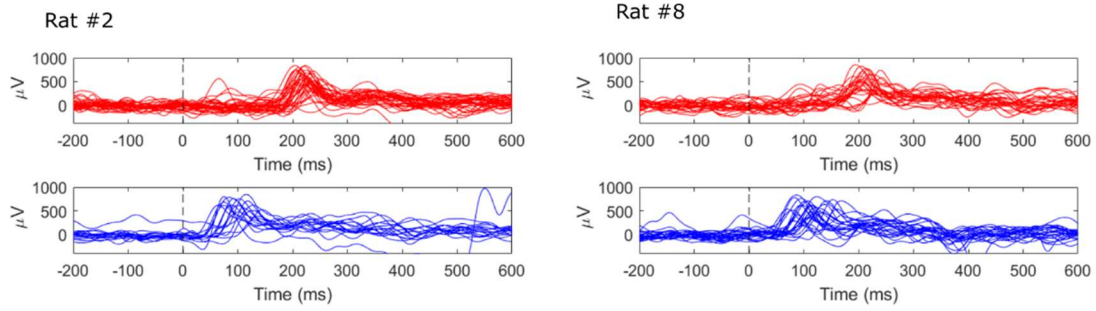

726

727

728

**Supplementary Figure 3.** Distinct sets of LEPs at short and long latency are seen within the datasets for individual animals.

729

730

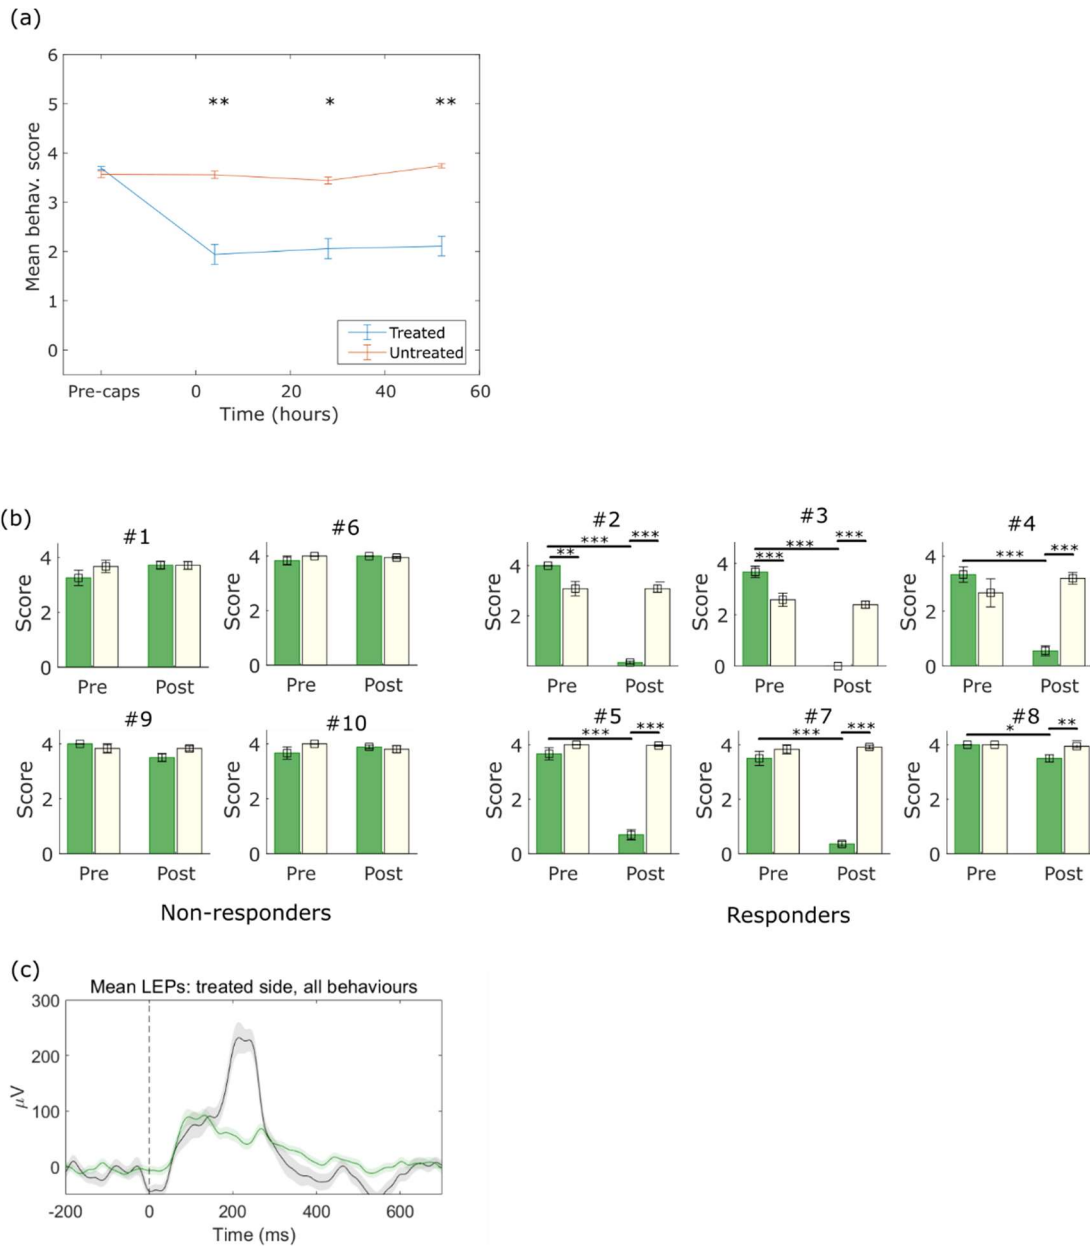

731

732

733

734

735

736

**Supplementary Figure 4.** (a) Mean behavioural responses at all timepoints (all animals), pre- and post-capsaicin. (b) Breakdown of behavioural responses by animal, categorized as responders and non-responders. (c) Mean LEP pre and post capsaicin over all behavioural responses for the responder group.

a)

| Site         | LEP amplitude versus...      |                           | LEP latencies versus...      |                           |
|--------------|------------------------------|---------------------------|------------------------------|---------------------------|
|              | Laser energy<br>(ANOVA F, p) | Behaviour<br>(ANOVA F, p) | Laser energy<br>(ANOVA F, p) | Behaviour<br>(ANOVA F, p) |
| Left frontal | 25.8, ***                    | 46.2, ***                 | 4.9, ***                     | 1.5, NS                   |
| Left sensory | 25.6, ***                    | 46.7, ***                 | 2.0, NS                      | 1.5, NS                   |
| Vertex       | 34.8, ***                    | 72.3, ***                 | 2.6, *                       | 1.3, NS                   |

b)

| Site         | LEP amplitude versus...                               |                                                |
|--------------|-------------------------------------------------------|------------------------------------------------|
|              | Laser energy at fixed behaviour (1-2)<br>(ANOVA F, p) | Behaviour at fixed laser energy<br>(1.25-1.5J) |
| Left frontal | 1.1, NS                                               | 15.8, ***                                      |
| Left sensory | 0.4, NS                                               | 16.4, ***                                      |
| Vertex       | 0.8, NS                                               | 31.8, ***                                      |

**Supplementary table 1. Results for additional EEG recording sites.** (a) Significance of relationships between LEP amplitude / latencies versus laser energy / behavioural outcome. (b) Significance of relationships between LEP amplitude versus laser energy at a given behaviour / behaviour at specific laser energy (\*\*\*)  $p < 0.001$ , \*\*  $p < 0.01$ , \*  $p < 0.05$ ).

737

738

739

740

741

742

743

a)

| Site         | Peak change in power relative to baseline (ANOVA F, p) versus... |           |           |             |            |             |
|--------------|------------------------------------------------------------------|-----------|-----------|-------------|------------|-------------|
|              | Laser energy                                                     |           |           | Behaviour   |            |             |
|              | Delta                                                            | Theta     | Gamma     | Delta       | Theta      | Gamma       |
| Left frontal | 32.1, ***                                                        | 37.0, *** | 10.2, *** | 159.16, *** | 177.2, *** | 203.09, *** |
| Left sensory | 63.2, ***                                                        | 41.2, *** | 6.2, **   | 151.4, ***  | 82.8, ***  | 207.6, ***  |
| Vertex       | 59.7, ***                                                        | 45.5, *** | 13.4, *** | 118.9, ***  | 100.2, *** | 37.4, ***   |

b)

| Site         | Peak change in power relative to baseline (ANOVA F, p) versus...                   |         |         |                                                |           |             |
|--------------|------------------------------------------------------------------------------------|---------|---------|------------------------------------------------|-----------|-------------|
|              | Laser energy<br>(grouped 0.75-1J, 1.25-1.5J, and 1.75-2J) at fixed behaviour (1-2) |         |         | Behaviour<br>(at fixed laser energy 1.25-1.5J) |           |             |
|              | Delta                                                                              | Theta   | Gamma   | Delta                                          | Theta     | Gamma       |
| Left frontal | 4.5, NS                                                                            | 0.7, NS | 1.9, NS | 48.6, ***                                      | 86.7, *** | 118.64, *** |
| Left sensory | 2.3, NS                                                                            | 3.9, NS | 9.1, *  | 50.4, ***                                      | 39.4, *** | 123.3, ***  |
| Vertex       | 3.2, NS                                                                            | 2.6, NS | 6.2, *  | 30.1, ***                                      | 36.4, *** | 13.8, **    |

**Supplementary table 2. Change in spectral power by site.** (a) Significance of relationships between maximum change in spectral power and laser energy / behavioural outcome. (b) Significance of relationships between spectral power and (i) laser energy at constant behaviour, (ii) behaviour at constant laser energy (\*\*\*)  $p < 0.001$ , \*\*  $p < 0.01$ , \*  $p < 0.05$ ).

744

745

746

747

748

749



| Type                            | Subtype         | Accuracy (% correct) :<br>behaviour classification | Accuracy (% correct) :<br>laser energy |
|---------------------------------|-----------------|----------------------------------------------------|----------------------------------------|
| <b>Decision trees</b>           | Coarse          | As above (73.3)                                    | 57.7                                   |
|                                 | Medium          | 70.1                                               | 56.1                                   |
|                                 | Fine            | 71.7                                               | 52.4                                   |
| <b>Linear Discriminant</b>      | N/A             | 72.4                                               | 59.3                                   |
| <b>Naïve Bayes (Gaussian)</b>   | N/A             | 68.3                                               | 57.9                                   |
| <b>Support Vector Mechanism</b> | Linear          | 74.7                                               | 62.1                                   |
|                                 | Cubic           | 68.1                                               | 52                                     |
|                                 | Quadratic       | 66.9                                               | 54.5                                   |
|                                 | Medium Gaussian | 70.1                                               | 57.5                                   |
|                                 | Fine Gaussian   | 52.6                                               | 46.4                                   |
| <b>K-nearest-neighbour</b>      | Fine            | 61.1                                               | 51.3                                   |
|                                 | Medium          | 66.7                                               | 58.2                                   |
|                                 | Coarse          | 72.2                                               | 59.1                                   |
| <b>Ensembles</b>                | Bagged Trees    | 72.2                                               | 55.9                                   |
|                                 | KNN             | 65.3                                               | 55.6                                   |

**Supplementary table 3. Results from alternative classification algorithms**

750

751

752

753

| Data used in classifier              | Outcome predicted         | Number of splits in decision tree | Accuracy (% correct) | Features used (in order of importance)                                 |
|--------------------------------------|---------------------------|-----------------------------------|----------------------|------------------------------------------------------------------------|
| <b>Vertex</b>                        |                           |                                   |                      |                                                                        |
| Vertex data                          | Behaviour                 | 3                                 | 73.3                 | Peak amplitude, peak latency, voltage at t=210-240ms                   |
| Vertex data                          | Behaviour                 | 1                                 | 60.7                 | Peak amplitude                                                         |
| Vertex data                          | Behaviour, 2 classes only | 3                                 | 86.2                 | Peak amplitude, peak latency, voltage at t=210-240ms.                  |
| Vertex data, including laser energy  | Behaviour                 | 3                                 | 73.3                 | Peak amplitude, peak latency, voltage at t=210-240ms                   |
| Vertex denoised data                 | Laser energy (3 classes)  | 3                                 | 55.4                 | Voltage at t=180-210ms, peak latency                                   |
| Vertex raw data (not denoised)       | Behaviour                 | 3                                 | 71.3                 | Peak amplitude, peak latency                                           |
| Laser energy only, 6 classes         | Behaviour                 | 3                                 | 55.4                 | Laser energy                                                           |
| Laser energy only, 3 grouped classes | Behaviour                 | 3                                 | 59.5                 | Laser energy                                                           |
| <b>Other EEG sites</b>               |                           |                                   |                      |                                                                        |
| Left frontal                         | Behaviour                 | 3                                 | 67.8                 | Peak amplitude, peak latency, voltage at t=240-270ms.                  |
| Left frontal                         | Laser energy (3 classes)  | 2                                 | 59.1                 | Peak amplitude and latency                                             |
| Left sensory                         | Behaviour                 | 2                                 | 70.3                 | Peak amplitude, peak latency                                           |
| Left sensory                         | Laser energy (3 classes)  | 2                                 | 62.9                 | Voltage at t=180-210ms, peak amplitude                                 |
| <b>Site combinations</b>             |                           |                                   |                      |                                                                        |
| Vertex + Left frontal                | Behaviour                 | 2                                 | 72.2                 | Vertex peak amplitude, left frontal peak amplitude                     |
| Vertex + Left sensory                | Behaviour                 | 5                                 | 72.4                 | Vertex peak amplitude left sensory peak amplitude, vertex peak latency |

754

755

756

757

758

759

760

**Supplementary table 4. Results from coarse decision tree using alternative features, sites and parameters.** Unless otherwise stated: 1) predictive features are the same as used in Figure 3 (i.e. voltage values at varying latency from laser, peak amplitude and latency, changes in power in delta, theta and gamma ranges). 2) Data used is denoised as per explanation in main text. 3) Behaviour was classified into 3 categories (no response, flinch and withdrawal).
